# Supplementary material for: Virome Variation during Sea Star Wasting Disease Progression in Pisaster ochraceus (Asteroidea, Echinodermata)
Source: Viruses. 2020 Nov 20;12(11):1332. doi: 10.3390/v12111332 (PMC7699681; doi:10.3390/v12111332)
Supplement: Supplementary file 1 [file viruses-12-01332-s001.zip]

Archive with 6 entries (6 files):
- Hewson_FigS1_FINAL.pdf
- Hewson_FigS2_FINAL.pdf
- Hewson_FigS3_FINAL.pdf
- Hewson_FigS4_FINAL.pdf
- Hewson_FigS5_FINAL.pdf
- Hewson_FigS6_FINAL.pdf
